# Supplementary material
Source: PubMed Central journal article supplement (PMC5392138)
Supplement: NIHMS844678-supplement-Supporting_infomation.pdf [file NIHMS844678-supplement-Supporting_infomation.pdf]

**Supplementary Information for**

**Drude Polarizable Force Field for Aliphatic Ketones and Aldehydes, and their Associated  
Acyclic Carbohydrates**

*Meagan C. Small<sup>†</sup>, Asaminew H. Aytenfisu<sup>†</sup>, Fang-Yu Lin, Xibing He, and*

*Alexander D. MacKerell, Jr.\**

Department of Pharmaceutical Sciences, University of Maryland School of Pharmacy, 20 Penn  
St., Baltimore MD 21201

<sup>†</sup>These authors contributed equally to this work.

\*Corresponding author: alex@outerbanks.umaryland.edu

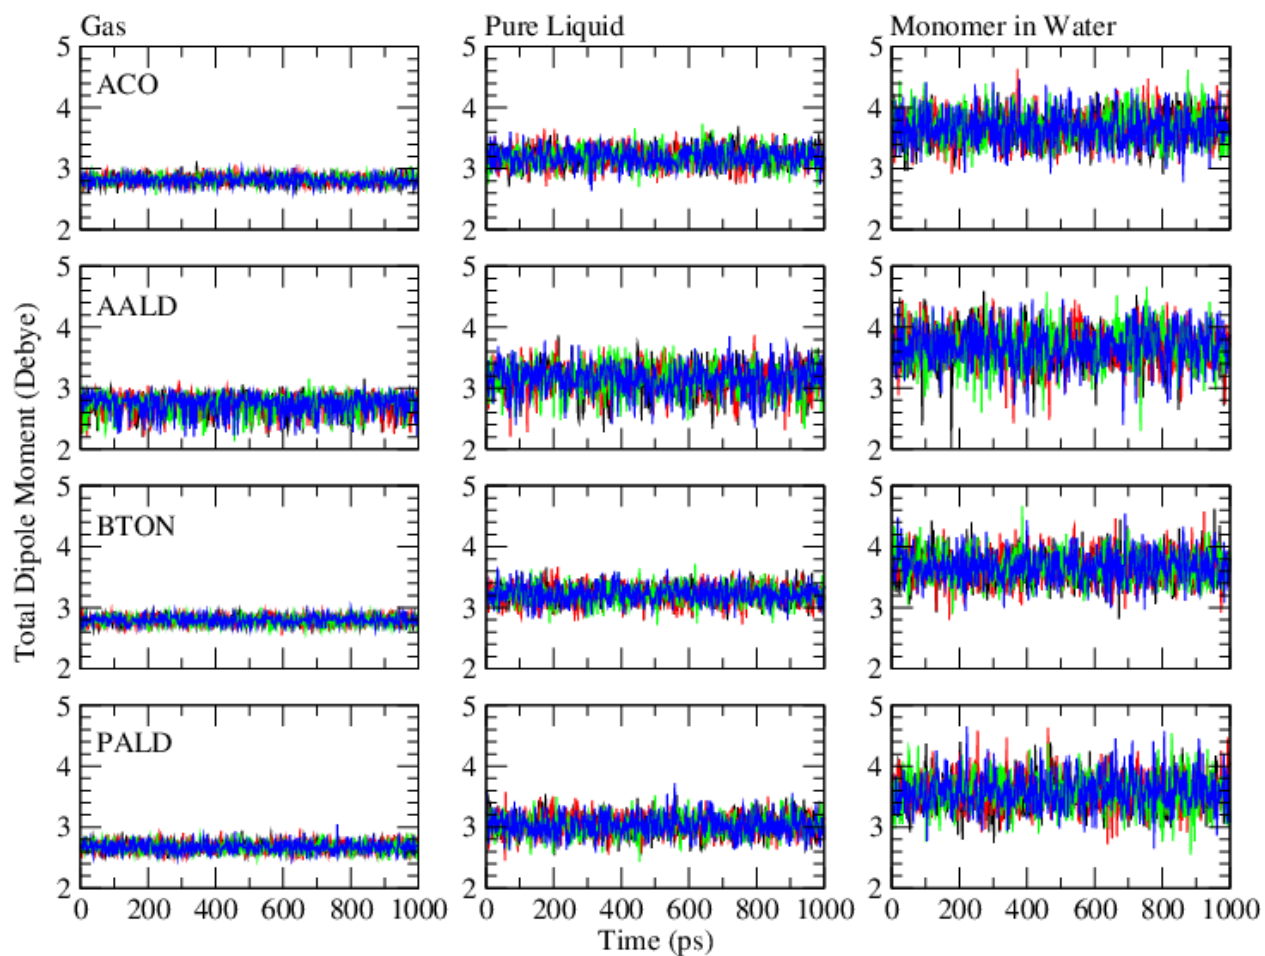

**Figure S1** Dipole moments as a function of time for acetone (ACO), acetaldehyde (AALD), butanone (BTON), and propionaldehyde (PALD) in the gas phase (left column), pure liquid (middle column), and aqueous solution (right column). Results from a series of 4 simulations are presented for each system.

**Table S1** Select distances (Å) and angles (degrees) for acetone (ACO) from crystal simulations performed using the Drude FF and from the experimental crystal conformation obtained from the CSD ID=HIXHIF03. Averages and standard errors are based on 3 simulations.

| <b>CSID:HIXHIF03</b>           |            | Average ± SE  |
|--------------------------------|------------|---------------|
| <b>12C2-12C1-12C3 (angle)</b>  | <b>exp</b> | <b>117.10</b> |
|                                | drude      | 116.72 ± 0.06 |
| <b>12O1 ... 9C1 (distance)</b> | <b>exp</b> | <b>3.40</b>   |
|                                | drude      | 3.67 ± 0.00   |
| <b>9C3 ...13C2 (distance)</b>  | <b>exp</b> | <b>4.10</b>   |
|                                | drude      | 4.35 ± 0.01   |
| <b>9C3 ... 2C3 (distance)</b>  | <b>exp</b> | <b>4.20</b>   |
|                                | drude      | 3.83 ± 0.01   |

**Table S2** Select distances (Å) and angles (degrees) for acetone (ACO) from crystal simulations performed using the Drude FF and from the experimental crystal conformation obtained from the CSD ID=HIXHIF05. Averages and standard errors are based on 3 simulations.

| <b>CSID:HIXHIF05</b>          |            | Average ± SE  |
|-------------------------------|------------|---------------|
| <b>1C2-1C1-1C3 (angle)</b>    | <b>exp</b> | <b>115.70</b> |
|                               | drude      | 116.84 ± 0.14 |
| <b>1O1 ... 3C1 (distance)</b> | <b>exp</b> | <b>3.20</b>   |
|                               | drude      | 3.63 ± 0.00   |
| <b>1C3 ... 2C2 (distance)</b> | <b>exp</b> | <b>3.50</b>   |
|                               | drude      | 3.37 ± 0.00   |
| <b>1C3 ... 3C3 (distance)</b> | <b>exp</b> | <b>4.30</b>   |
|                               | drude      | 4.27 ± 0.00   |

**Table S3** Select distances (Å) and angles (degrees) for acetone (ACO) from crystal simulations performed using the Drude FF and optimized ACO parameters and from the experimental crystal conformation obtained from the CSD ID=HIXHIF02. Averages and standard errors are based on 3 simulations.

| <b>CSID:HIXHIF02</b>            |            | Average ± SE  |
|---------------------------------|------------|---------------|
| <b>11C2-11C1-11C3</b>           |            |               |
| <b>(angle)</b>                  | <b>exp</b> | <b>116.30</b> |
|                                 | drude      | 116.68 ± 0.13 |
| <b>11O1 ... 14C1 (distance)</b> | <b>exp</b> | <b>3.50</b>   |
|                                 | drude      | 3.69 ± 0.01   |
| <b>10C2 ... 14C3 (distance)</b> | <b>exp</b> | <b>4.20</b>   |
|                                 | drude      | 4.39 ± 0.02   |
| <b>1C3 ...14C3(distance)</b>    | <b>exp</b> | <b>4.10</b>   |
|                                 | drude      | 3.87± 0.01    |

**Table S4** Bond lengths (Å) and angles (degrees) for D-allose and D-psicose from QM optimizations at the MP2/6-31G(d) level of theory and the Drude force field. Only bonds and angles containing the covalent linkage between the polyols and ketone/aldehydes as shown here were optimized.

|           | Atoms     | QM     | MM     | MM-QM |
|-----------|-----------|--------|--------|-------|
| D-allose  | C1-C2     | 1.51   | 1.52   | 0.01  |
|           | H1-C1-C2  | 117.73 | 116.99 | -0.74 |
|           | O1-C1-C2  | 120.04 | 123.97 | 3.93  |
|           | C1-C2-O2  | 109.19 | 112.45 | 3.26  |
|           | C1-C2-H2  | 109.07 | 104.42 | -4.65 |
| D-psicose | C2-C3     | 1.52   | 1.53   | 0.01  |
|           | C1-C2     | 1.51   | 1.54   | 0.03  |
|           | H11-C1-C2 | 108.76 | 107.95 | -0.81 |
|           | H12-C1-C2 | 107.66 | 108.13 | 0.47  |
|           | C1-C2=O2  | 119.42 | 122.01 | 2.59  |
|           | O2=C2-C3  | 121.68 | 121.16 | -0.52 |
|           | C1-C2-C3  | 118.90 | 116.78 | -2.12 |
|           | C2-C3-O3  | 106.66 | 110.01 | 3.35  |
|           | C2-C3-H3  | 106.91 | 106.08 | -0.83 |
| C2-C3-C4  | 110.7     | 113.42 | 2.72   |       |

**Table S5** Topology and parameter files for acetone (ACO), butanone (BTON), acetaldehyde (AALD), propionaldehyde (PALD), butyraldehyde, isobutyraldehyde, D-allose and D-psicose.

\* Toppar stream file for drude aliphate aldehyde and  
 \* ketone model compounds  
 \*

ioformat extended

read rtf card append

\* Topology for drude model compounds

\*

34

AUTOGENERATE ANGLES DIHEDRALS DRUDE

RESI AALD 0.00 ! acetaldehyde

```
!      O  HB1
!      ||  |
!  HA---C---CB---HB3
!           |
!           HB2
```

GROUP

|          |        |        |               |              |
|----------|--------|--------|---------------|--------------|
| ATOM HA  | HDP1C  | 0.011  |               |              |
| ATOM C   | CD2O1C | 0.300  | ALPHA -1.1432 | THOLE 1.1720 |
| ATOM O   | OD2C1C | 0.000  | ALPHA -0.8125 | THOLE 1.2500 |
| ATOM CB  | CD33C  | -0.088 | ALPHA -1.3500 | THOLE 1.1500 |
| ATOM HB1 | HDA3A  | 0.056  |               |              |
| ATOM HB2 | HDA3A  | 0.056  |               |              |
| ATOM HB3 | HDA3A  | 0.056  |               |              |
| ATOM LPA | LPD    | -0.234 |               |              |
| ATOM LPB | LPD    | -0.157 |               |              |

BOND HA C C CB CB HB1 CB HB2 CB HB3

BOND O LPA O LPB

DOUB C O

IMPR C HA CB O

ACCE O

LONEPAIR relative LPA O C HA distance 0.30 angle 91.0 dihe 0.0

LONEPAIR relative LPB O C HA distance 0.30 angle 91.0 dihe 180.0

ANISOTROPY O C LPA LPB A11 0.85956 A22 1.13122

IC O C CB HB1 1.2074 123.73 -0.46 108.58 1.1053

IC HB2 CB C O 1.0625 110.65 118.23 123.73 1.2074

IC HB3 CB C O 1.0898 105.98 -126.83 123.73 1.2074

IC HA O \*C CB 1.1347 126.86 -176.51 123.73 1.5462

PATCHING FIRST NONE LAST NONE

RESI PALD 0.00 ! propionaldehyde

```
!      O  HB1  HG1
!      ||  |  |
```

```

! HA---C---CB---CG---HG3
!           |   |
!           HB2  HG2

```

GROUP

```

ATOM HA      HDP1C    0.011
ATOM C       CD2O1C   0.300      ALPHA -1.1432 THOLE 1.1720
ATOM O       OD2C1C   0.000      ALPHA -0.8125 THOLE 1.2500
ATOM CB      CD32C   -0.088      ALPHA -1.3500 THOLE 1.1500
ATOM HB1     HDA2A    0.056
ATOM HB2     HDA2A    0.056
ATOM LPA     LPD      -0.234
ATOM LPB     LPD      -0.157
ATOM CG      CD33A   -0.064      ALPHA -1.254 THOLE 1.779
ATOM HG1     HDA3A    0.040
ATOM HG2     HDA3A    0.040
ATOM HG3     HDA3A    0.040

```

BOND HA C C CB CB HB1 CB HB2

BOND CB CG CG HG1 CG HG3 CG HG2

BOND O LPA O LPB

DOUBLE C O

IMPR C HA CB O

ACCE O

LONEPAIR relative LPA O C HA distance 0.30 angle 91.0 dihe 0.0

LONEPAIR relative LPB O C HA distance 0.30 angle 91.0 dihe 180.0

ANISOTROPY O C LPA LPB A11 0.85956 A22 1.13122

```

IC O C CB CG      0.0      0.0      0.0      0.0      0.0
IC CG CB C HA     0.0      0.0     180.0     0.0      0.0
IC HB1 CB C O     0.0      0.0     120.0     0.0      0.0
IC HB2 CB C O     0.0      0.0    -120.0     0.0      0.0
IC C CB CG HG1   0.0      0.0     180.0     0.0      0.0
IC C CB CG HG2   0.0      0.0      60.0     0.0      0.0
IC C CB CG HG3   0.0      0.0    -60.0     0.0      0.0

```

PATCHING FIRST NONE LAST NONE

RESI BALD 0.00 ! Butaryaldehyde

```

!           O  HB1  HG1  HF1
!           ||  |   |   |
! HA---C---CB---CG---CF---HF3
!           |   |   |
!           HB2  HG2  HF2

```

GROUP

```

ATOM HA      HDP1C    0.011
ATOM C       CD2O1C   0.300      ALPHA -1.1432 THOLE 1.1720
ATOM O       OD2C1C   0.000      ALPHA -0.8125 THOLE 1.2500
ATOM CB      CD32C   -0.088      ALPHA -1.3500 THOLE 1.1500
ATOM HB1     HDA2A    0.056
ATOM HB2     HDA2A    0.056
ATOM LPA     LPD      -0.234
ATOM LPB     LPD      -0.157
ATOM CG      CD32A   -0.080      ALPHA -1.254 THOLE 1.779
ATOM HG1     HDA2A    0.040
ATOM HG2     HDA2A    0.040

```



ATOM CF CD33A -0.064 ALPHA -1.254 THOLE 1.779  
 ATOM HF1 HDA3A 0.040  
 ATOM HF2 HDA3A 0.040  
 ATOM HF3 HDA3A 0.040

BOND HA C C CB CB HB1 CB HB2  
 BOND CB CG CG HG1 CG HG2 CG CF CF HF1 CF HF2 CF HF3  
 BOND O LPA O LPB

DOUBLE C O  
 IMPR C HA CB O  
 ACCE O

LONEPAIR relative LPA O C HA distance 0.30 angle 91.0 dihe 0.0  
 LONEPAIR relative LPB O C HA distance 0.30 angle 91.0 dihe 180.0  
 ANISOTROPY O C LPA LPB A11 0.85956 A22 1.13122

IC O C CB CG 0.0 0.0 0.0 0.0 0.0  
 IC CG CB C HA 0.0 0.0 180.0 0.0 0.0  
 IC HB1 CB C O 0.0 0.0 120.0 0.0 0.0  
 IC HB2 CB C O 0.0 0.0 -120.0 0.0 0.0  
 IC C CB CG HG1 0.0 0.0 180.0 0.0 0.0  
 IC C CB CG HG2 0.0 0.0 60.0 0.0 0.0  
 IC C CB CG CF 0.0 0.0 -60.0 0.0 0.0

IC CB CG CF HF1 0.0 0.0 -180.0 0.0 0.0  
 IC CB CG CF HF2 0.0 0.0 60.0 0.0 0.0  
 IC CB CG CF HF3 0.0 0.0 -60.0 0.0 0.0

PATCHING FIRST NONE LAST NONE

RESI IBLD 0.00 ! Isobutaryaldehyde

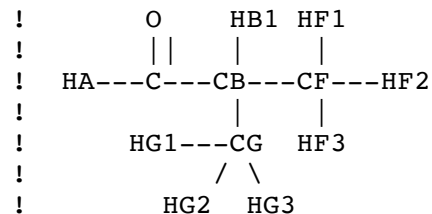

GROUP

ATOM HA HDP1C 0.011  
 ATOM C CD201C 0.300 ALPHA -1.1432 THOLE 1.1720  
 ATOM O OD2C1C 0.000 ALPHA -0.8125 THOLE 1.2500  
 ATOM CB CD31C -0.088 ALPHA -1.3500 THOLE 1.1500  
 ATOM HB1 HDA1A 0.056  
 ATOM LPA LPD -0.234  
 ATOM LPB LPD -0.157  
 ATOM CG CD33A -0.064 ALPHA -1.254 THOLE 1.779  
 ATOM HG1 HDA3A 0.040  
 ATOM HG2 HDA3A 0.040  
 ATOM HG3 HDA3A 0.040  
 ATOM CF CD33A -0.064 ALPHA -1.254 THOLE 1.779  
 ATOM HF1 HDA3A 0.040  
 ATOM HF2 HDA3A 0.040  
 ATOM HF3 HDA3A 0.040

BOND HA C C CB CB HB1  
 BOND CB CG CG HG1 CG HG2 CG HG3

BOND CB CF CF HF1 CF HF2 CF HF3

BOND O LPA O LPB

DOUBLE C O

IMPR C HA CB O

ACCE O

LONEPAIR relative LPA O C HA distance 0.30 angle 91.0 dihe 0.0

LONEPAIR relative LPB O C HA distance 0.30 angle 91.0 dihe 180.0

ANISOTROPY O C LPA LPB A11 0.85956 A22 1.13122

IC O C CB CG 0.0 0.0 0.0 0.0 0.0

IC CG CB C HA 0.0 0.0 180.0 0.0 0.0

IC HB1 CB C O 0.0 0.0 120.0 0.0 0.0

IC CF CB C O 0.0 0.0 -120.0 0.0 0.0

IC C CB CG HG1 0.0 0.0 180.0 0.0 0.0

IC C CB CG HG2 0.0 0.0 60.0 0.0 0.0

IC C CB CG HG3 0.0 0.0 -60.0 0.0 0.0

IC C CB CF HF1 0.0 0.0 180.0 0.0 0.0

IC C CB CF HF2 0.0 0.0 60.0 0.0 0.0

IC C CB CF HF3 0.0 0.0 -60.0 0.0 0.0

PATCHING FIRST NONE LAST NONE

RESI ACO 0.0 ! acetone

! H22 O1 H32

! H21-C2--C1--C3-H31

! H23 H33

GROUP

ATOM O1 OD2C1D 0.000 ALPHA -0.638 THOLE 1.426

ATOM C1 CD2O1D 0.486 ALPHA -1.154 THOLE 1.235

ATOM C2 CD33C -0.201 ALPHA -1.293 THOLE 1.181

ATOM H21 HDA3A 0.062

ATOM H22 HDA3A 0.062

ATOM H23 HDA3A 0.062

ATOM C3 CD33C -0.201 ALPHA -1.293 THOLE 1.181

ATOM H31 HDA3A 0.062

ATOM H32 HDA3A 0.062

ATOM H33 HDA3A 0.062

ATOM LPA LPD -0.228

ATOM LPB LPD -0.228

BOND C1 C2 C1 C3

BOND C2 H21 C2 H22 C2 H23

BOND C3 H31 C3 H32 C3 H33

BOND O1 LPA O1 LPB

DOUBLE O1 C1

IMPR C1 C2 C3 O1

ACCE O1

!from NMA

LONEPAIR relative LPA O1 C1 C2 distance 0.30 angle 91.0 dihe 0.0

LONEPAIR relative LPB O1 C1 C2 distance 0.30 angle 91.0 dihe 180.0

ANISOTROPY O1 C1 LPA LPB A11 0.86650 A22 1.07246

IC C2 C1 C3 H31 1.5366 110.58 135.22 109.51 1.1328

|       |    |    |     |        |        |         |        |        |
|-------|----|----|-----|--------|--------|---------|--------|--------|
| IC O1 | C1 | C3 | H31 | 1.2237 | 122.95 | -42.47  | 109.51 | 1.1328 |
| IC O1 | C1 | C3 | H32 | 1.2237 | 122.95 | 77.28   | 104.63 | 1.1325 |
| IC O1 | C1 | C3 | H33 | 1.2237 | 122.95 | -161.85 | 105.76 | 1.0732 |
| IC C3 | C1 | C2 | H21 | 1.5233 | 110.58 | -153.74 | 111.52 | 1.1204 |
| IC O1 | C1 | C2 | H21 | 1.2237 | 126.42 | 23.85   | 111.52 | 1.1204 |
| IC O1 | C1 | C2 | H22 | 1.2237 | 126.42 | 148.26  | 114.11 | 1.1296 |
| IC O1 | C1 | C2 | H23 | 1.2237 | 126.42 | -90.21  | 101.67 | 1.1375 |

PATCHING FIRST NONE LAST NONE

RESI BTON 0.0 ! 2-butanone

```

!      H22 O1 H32 H42
!      |  ||  |  |
! H23-C2--C1--C3--C4-H43
!      |  |  |  |
!      H21      H31 H41

```

GROUP

|          |        |        |       |        |       |       |
|----------|--------|--------|-------|--------|-------|-------|
| ATOM O1  | OD2C1D | 0.000  | ALPHA | -0.638 | THOLE | 1.426 |
| ATOM C1  | CD2O1D | 0.486  | ALPHA | -1.154 | THOLE | 1.235 |
| ATOM C2  | CD33C  | -0.201 | ALPHA | -1.293 | THOLE | 1.181 |
| ATOM C3  | CD32C  | -0.139 | ALPHA | -1.293 | THOLE | 1.181 |
| ATOM H21 | HDA3A  | 0.062  |       |        |       |       |
| ATOM H22 | HDA3A  | 0.062  |       |        |       |       |
| ATOM H23 | HDA3A  | 0.062  |       |        |       |       |
| ATOM H31 | HDA2A  | 0.062  |       |        |       |       |
| ATOM H32 | HDA2A  | 0.062  |       |        |       |       |
| ATOM LPA | LPD    | -0.228 |       |        |       |       |
| ATOM LPB | LPD    | -0.228 |       |        |       |       |
| ATOM C4  | CD33A  | -0.177 | ALPHA | -1.751 | THOLE | 1.185 |
| ATOM H41 | HDA3A  | 0.059  |       |        |       |       |
| ATOM H42 | HDA3A  | 0.059  |       |        |       |       |
| ATOM H43 | HDA3A  | 0.059  |       |        |       |       |

```

BOND C1 C2 C1 C3 C3 C4
BOND C2 H21 C2 H22 C2 H23
BOND C3 H31 C3 H32
BOND C4 H41 C4 H42 C4 H43
BOND O1 LPA O1 LPB
DOUBLE O1 C1
IMPR C1 C2 C3 O1
ACCE O1
!from NMA

```

```

LONEPAIR relative LPA O1 C1 C2 distance 0.30 angle 91.0 dihe 0.0
LONEPAIR relative LPB O1 C1 C2 distance 0.30 angle 91.0 dihe 180.0
ANISOTROPY O1 C1 LPA LPB A11 0.86650 A22 1.07246
IC C2 C1 C3 H31 1.5366 116.31 56.91 107.51 1.1328
IC O1 C1 C3 H31 1.2237 122.02 -123.36 107.51 1.1328
IC O1 C1 C3 H32 1.2237 122.02 124.49 107.48 1.1325
IC C3 C1 C2 H21 1.5233 110.58 -153.74 111.52 1.1204
IC O1 C1 C2 H21 1.2237 126.42 23.85 111.52 1.1204
IC O1 C1 C2 H22 1.2237 126.42 148.26 114.11 1.1296
IC O1 C1 C2 H23 1.2237 126.42 -90.21 101.67 1.1375
IC O1 C1 C3 C4 1.2237 122.02 0.50 114.19 1.5261
IC C2 C1 C3 C4 1.5366 116.31 -179.21 114.19 1.5261
IC C1 C3 C4 H41 1.5233 114.19 -60.64 111.01 1.0980
IC C1 C3 C4 H42 1.5233 114.19 178.91 110.72 1.0989

```

IC C1 C3 C4 H43 1.5233 114.19 58.43 111.02 1.0980  
PATCHING FIRST NONE LAST NONE

!carbonyl containing acyclic sugars

RESI ALLO 0.000 ! D-allose

```
!      HA      O1
!      \      //
!      C1      transferred from AALD
!      |
!      HO2-O2-C2-H2
!      |
!      HO3-O3-C3-H3
!      |
!      HO4-O4-C4-H4
!      |
!      HO5-O5-C5-H5
!      |
!      H61-C6-H62
!      |
!      O6-HO6
!
```

GROUP

|           |        |        |               |              |  |
|-----------|--------|--------|---------------|--------------|--|
| ATOM H1   | HDP1C  | 0.011  |               |              |  |
| ATOM C1   | CD2O1C | 0.3    | ALPHA -1.1432 | THOLE 1.1720 |  |
| ATOM O1   | OD2C1C | 0.000  | ALPHA -0.8125 | THOLE 1.2500 |  |
| ATOM LP1A | LPD    | -0.234 |               |              |  |
| ATOM LP1B | LPD    | -0.157 |               |              |  |
| ATOM C2   | CD31G  | 0.090  | ALPHA -1.650  | THOLE 0.700  |  |
| ATOM H2   | HDA1A  | 0.070  |               |              |  |
| ATOM O2   | OD31E  | 0.000  | ALPHA -1.000  | THOLE 1.000  |  |
| ATOM HO2  | HDP1A  | 0.320  |               |              |  |
| ATOM LP2A | LPD    | -0.200 |               |              |  |
| ATOM LP2B | LPD    | -0.200 |               |              |  |

GROUP

|           |       |        |              |             |  |
|-----------|-------|--------|--------------|-------------|--|
| ATOM C3   | CD31G | 0.010  | ALPHA -1.650 | THOLE 0.700 |  |
| ATOM H3   | HDA1A | 0.070  |              |             |  |
| ATOM O3   | OD31E | 0.000  | ALPHA -1.000 | THOLE 1.000 |  |
| ATOM HO3  | HDP1A | 0.320  |              |             |  |
| ATOM LP3A | LPD   | -0.200 |              |             |  |
| ATOM LP3B | LPD   | -0.200 |              |             |  |

GROUP

|           |       |        |              |             |  |
|-----------|-------|--------|--------------|-------------|--|
| ATOM C4   | CD31G | 0.010  | ALPHA -1.650 | THOLE 0.700 |  |
| ATOM H4   | HDA1A | 0.070  |              |             |  |
| ATOM O4   | OD31E | 0.000  | ALPHA -1.000 | THOLE 1.000 |  |
| ATOM HO4  | HDP1A | 0.320  |              |             |  |
| ATOM LP4A | LPD   | -0.200 |              |             |  |
| ATOM LP4B | LPD   | -0.200 |              |             |  |

GROUP

|           |       |        |              |             |  |
|-----------|-------|--------|--------------|-------------|--|
| ATOM C5   | CD31G | 0.010  | ALPHA -1.650 | THOLE 0.700 |  |
| ATOM H5   | HDA1A | 0.070  |              |             |  |
| ATOM O5   | OD31E | 0.000  | ALPHA -1.000 | THOLE 1.000 |  |
| ATOM HO5  | HDP1A | 0.320  |              |             |  |
| ATOM LP5A | LPD   | -0.200 |              |             |  |
| ATOM LP5B | LPD   | -0.200 |              |             |  |

## GROUP

ATOM C6 CD32F -0.060 ALPHA -1.650 THOLE 0.700  
 ATOM H61 HDA2A 0.070  
 ATOM H62 HDA2A 0.070  
 ATOM O6 OD31E 0.000 ALPHA -1.000 THOLE 1.000  
 ATOM HO6 HDP1A 0.320  
 ATOM LP6A LPD -0.200  
 ATOM LP6B LPD -0.200

BOND C1 H1 C1 O1 C1 C2  
 BOND C2 H2 C2 C3 C2 O2 O2 HO2  
 BOND C3 H3 C3 C4 C3 O3 O3 HO3  
 BOND C4 H4 C4 O4 C4 C5 O4 HO4  
 BOND C5 H5 C5 O5 C5 C6 O5 HO5  
 BOND C6 H61 C6 O6 C6 H62 O6 HO6  
 BOND O1 LP1A O1 LP1B  
 BOND O2 LP2A O2 LP2B  
 BOND O3 LP3A O3 LP3B  
 BOND O4 LP4A O4 LP4B  
 BOND O5 LP5A O5 LP5B  
 BOND O6 LP6A O6 LP6B  
 IMPR C1 H1 C2 O1

LONEPAIR relative LP1A O1 C1 H1 distance 0.30 angle 91.0 dihe 0.0  
 LONEPAIR relative LP1B O1 C1 H1 distance 0.30 angle 91.0 dihe 180.0  
 LONEPAIR relative LP2A O2 C2 HO2 distance 0.35 angle 110.0 dihe 91.0  
 LONEPAIR relative LP2B O2 C2 HO2 distance 0.35 angle 110.0 dihe 269.0  
 LONEPAIR relative LP3A O3 C3 HO3 distance 0.35 angle 110.0 dihe 91.0  
 LONEPAIR relative LP3B O3 C3 HO3 distance 0.35 angle 110.0 dihe 269.0  
 LONEPAIR relative LP4A O4 C4 HO4 distance 0.35 angle 110.0 dihe 91.0  
 LONEPAIR relative LP4B O4 C4 HO4 distance 0.35 angle 110.0 dihe 269.0  
 LONEPAIR relative LP5A O5 C5 HO5 distance 0.35 angle 110.0 dihe 91.0  
 LONEPAIR relative LP5B O5 C5 HO5 distance 0.35 angle 110.0 dihe 269.0  
 LONEPAIR relative LP6A O6 C6 HO6 distance 0.35 angle 110.0 dihe 91.0  
 LONEPAIR relative LP6B O6 C6 HO6 distance 0.35 angle 110.0 dihe 269.0  
 ANISOTROPY O1 C1 LP1A LP1B A11 0.85956 A22 1.13122  
 ANISOTROPY O2 C2 LP2A LP2B A11 0.8108 A22 1.2162  
 ANISOTROPY O3 C3 LP3A LP3B A11 0.8108 A22 1.2162  
 ANISOTROPY O4 C4 LP4A LP4B A11 0.8108 A22 1.2162  
 ANISOTROPY O5 C5 LP5A LP5B A11 0.8108 A22 1.2162  
 ANISOTROPY O6 C6 LP6A LP6B A11 0.8108 A22 1.2162

| !  | I  | J  | K   | L   | R(IK)  | T(IKJ) | PHI     | T(JKL) | R(KL)  |
|----|----|----|-----|-----|--------|--------|---------|--------|--------|
| IC | C1 | C2 | C3  | C4  | 1.6170 | 111.59 | 180.00  | 110.42 | 1.5369 |
| IC | C2 | C3 | C4  | C5  | 1.5300 | 110.42 | 180.00  | 110.20 | 1.5320 |
| IC | C3 | C4 | C5  | C6  | 1.5369 | 110.20 | 180.00  | 108.72 | 1.5316 |
| IC | C3 | C2 | C1  | O1  | 1.5000 | 113.80 | 180.00  | 124.00 | 1.2050 |
| IC | O1 | C2 | *C1 | H1  | 1.4350 | 108.07 | 180.00  | 105.35 | 1.0997 |
| IC | C3 | C1 | *C2 | O2  | 1.5300 | 111.59 | 120.00  | 109.42 | 1.4226 |
| IC | C3 | C1 | *C2 | H2  | 1.4226 | 109.42 | -120.00 | 109.09 | 1.1814 |
| IC | C1 | C2 | O2  | HO2 | 1.6170 | 109.42 | -60.00  | 99.72  | 0.9669 |
| IC | C4 | C2 | *C3 | O3  | 1.5369 | 110.42 | 120.00  | 111.02 | 1.4276 |
| IC | C4 | C2 | *C3 | H3  | 1.4276 | 111.02 | -120.00 | 106.54 | 1.1878 |
| IC | C2 | C3 | O3  | HO3 | 1.5300 | 111.02 | -60.00  | 98.73  | 0.9915 |
| IC | C5 | C3 | *C4 | O4  | 1.5320 | 110.20 | 120.00  | 112.07 | 1.3955 |

|    |    |    |     |     |        |        |         |        |        |
|----|----|----|-----|-----|--------|--------|---------|--------|--------|
| IC | C5 | C3 | *C4 | H4  | 1.3955 | 112.07 | -120.00 | 113.60 | 1.0969 |
| IC | C3 | C4 | O4  | HO4 | 1.5369 | 112.07 | -60.00  | 103.63 | 0.9940 |
| IC | C6 | C4 | *C5 | O5  | 1.5316 | 108.72 | 120.00  | 111.89 | 1.3976 |
| IC | C6 | C4 | *C5 | H5  | 1.5316 | 108.72 | -120.00 | 105.82 | 1.1468 |
| IC | C4 | C5 | O5  | HO5 | 1.5320 | 111.89 | -60.00  | 105.13 | 0.9258 |
| IC | C4 | C5 | C6  | O6  | 1.5320 | 108.72 | 180.00  | 105.74 | 1.4909 |
| IC | O6 | C5 | *C6 | H61 | 1.4909 | 105.74 | 120.00  | 106.59 | 1.0511 |
| IC | O6 | C5 | *C6 | H62 | 1.0511 | 106.59 | -120.00 | 106.23 | 1.0677 |
| IC | C5 | C6 | O6  | HO6 | 1.5316 | 105.74 | 180.00  | 115.02 | 0.9350 |

PATC FIRS NONE LAST NONE

RESI PSIC 0.000 ! D-psicose

```

!           O1-HO1
!           |
!         H11-C1-H12
!           |
!         C2=O2
!           |
!       HO3-O3-C3-H3
!           |
!       HO4-O4-C4-H4
!           |
!       HO5-O5-C5-H5
!           |
!         H61-C6-H62
!           |
!         O6-HO6
!

```

GROUP

|      |      |        |        |       |        |       |       |
|------|------|--------|--------|-------|--------|-------|-------|
| ATOM | C1   | CD32F  | -0.090 | ALPHA | -1.650 | THOLE | 0.700 |
| ATOM | H11  | HDA2A  | 0.070  |       |        |       |       |
| ATOM | H12  | HDA2A  | 0.070  |       |        |       |       |
| ATOM | O1   | OD31E  | 0.000  | ALPHA | -1.000 | THOLE | 1.000 |
| ATOM | HO1  | HDP1A  | 0.320  |       |        |       |       |
| ATOM | LP1A | LPD    | -0.200 |       |        |       |       |
| ATOM | LP1B | LPD    | -0.200 |       |        |       |       |
| ATOM | C2   | CD2O1D | 0.486  | ALPHA | -1.154 | THOLE | 1.235 |
| ATOM | O2   | OD2C1D | 0.000  | ALPHA | -0.638 | THOLE | 1.426 |
| ATOM | LP2A | LPD    | -0.228 |       |        |       |       |
| ATOM | LP2B | LPD    | -0.228 |       |        |       |       |

GROUP

|      |      |       |        |       |        |       |       |
|------|------|-------|--------|-------|--------|-------|-------|
| ATOM | C3   | CD31G | 0.010  | ALPHA | -1.650 | THOLE | 0.700 |
| ATOM | H3   | HDA1A | 0.070  |       |        |       |       |
| ATOM | O3   | OD31E | 0.000  | ALPHA | -1.000 | THOLE | 1.000 |
| ATOM | HO3  | HDP1A | 0.320  |       |        |       |       |
| ATOM | LP3A | LPD   | -0.200 |       |        |       |       |
| ATOM | LP3B | LPD   | -0.200 |       |        |       |       |

GROUP

|      |      |       |        |       |        |       |       |
|------|------|-------|--------|-------|--------|-------|-------|
| ATOM | C4   | CD31G | 0.010  | ALPHA | -1.650 | THOLE | 0.700 |
| ATOM | H4   | HDA1A | 0.070  |       |        |       |       |
| ATOM | O4   | OD31E | 0.000  | ALPHA | -1.000 | THOLE | 1.000 |
| ATOM | HO4  | HDP1A | 0.320  |       |        |       |       |
| ATOM | LP4A | LPD   | -0.200 |       |        |       |       |
| ATOM | LP4B | LPD   | -0.200 |       |        |       |       |

## GROUP

ATOM C5 CD31G 0.010 ALPHA -1.650 THOLE 0.700  
 ATOM H5 HDA1A 0.070  
 ATOM O5 OD31E 0.000 ALPHA -1.000 THOLE 1.000  
 ATOM HO5 HDP1A 0.320  
 ATOM LP5A LPD -0.200  
 ATOM LP5B LPD -0.200

## GROUP

ATOM C6 CD32F -0.060 ALPHA -1.650 THOLE 0.700  
 ATOM H61 HDA2A 0.070  
 ATOM H62 HDA2A 0.070  
 ATOM O6 OD31E 0.000 ALPHA -1.000 THOLE 1.000  
 ATOM HO6 HDP1A 0.320  
 ATOM LP6A LPD -0.200  
 ATOM LP6B LPD -0.200

BOND C1 O1 C1 H11 O1 HO1 C1 H12 C1 C2  
 BOND C2 O2 C2 C3 C3 H3  
 BOND C3 O3 O3 HO3 C3 C4 C4 H4 C4 O4  
 BOND O4 HO4 C4 C5 C5 H5 C5 C6 C6 H61  
 BOND C6 H62 C6 O6 O6 HO6 C5 O5 O5 HO5

BOND O1 LP1A O1 LP1B

BOND O2 LP2A O2 LP2B

BOND O3 LP3A O3 LP3B

BOND O4 LP4A O4 LP4B

BOND O5 LP5A O5 LP5B

BOND O6 LP6A O6 LP6B

IMPR C2 C1 C3 O2

LONEPAIR relative LP1A O1 C1 HO1 distance 0.35 angle 110.0 dihe 91.0  
 LONEPAIR relative LP1B O1 C1 HO1 distance 0.35 angle 110.0 dihe 269.0  
 LONEPAIR relative LP2A O2 C2 C1 distance 0.30 angle 91.0 dihe 0.0  
 LONEPAIR relative LP2B O2 C2 C1 distance 0.30 angle 91.0 dihe 180.0  
 LONEPAIR relative LP3A O3 C3 HO3 distance 0.35 angle 110.0 dihe 91.0  
 LONEPAIR relative LP3B O3 C3 HO3 distance 0.35 angle 110.0 dihe 269.0  
 LONEPAIR relative LP4A O4 C4 HO4 distance 0.35 angle 110.0 dihe 91.0  
 LONEPAIR relative LP4B O4 C4 HO4 distance 0.35 angle 110.0 dihe 269.0  
 LONEPAIR relative LP5A O5 C5 HO5 distance 0.35 angle 110.0 dihe 91.0  
 LONEPAIR relative LP5B O5 C5 HO5 distance 0.35 angle 110.0 dihe 269.0  
 LONEPAIR relative LP6A O6 C6 HO6 distance 0.35 angle 110.0 dihe 91.0  
 LONEPAIR relative LP6B O6 C6 HO6 distance 0.35 angle 110.0 dihe 269.0

ANISOTROPY O1 C1 LP1A LP1B A11 0.8108 A22 1.2162

ANISOTROPY O2 C2 LP2A LP2B A11 0.8665 A22 1.07246

ANISOTROPY O3 C3 LP3A LP3B A11 0.8108 A22 1.2162

ANISOTROPY O4 C4 LP4A LP4B A11 0.8108 A22 1.2162

ANISOTROPY O5 C5 LP5A LP5B A11 0.8108 A22 1.2162

ANISOTROPY O6 C6 LP6A LP6B A11 0.8108 A22 1.2162

| !  | I  | J  | K   | L   | R(IK)  | T(IKJ) | PHI    | T(JKL) | R(KL)  |
|----|----|----|-----|-----|--------|--------|--------|--------|--------|
| IC | C1 | C2 | C3  | C4  | 1.6170 | 111.59 | 180.00 | 110.42 | 1.5369 |
| IC | C2 | C3 | C4  | C5  | 1.5300 | 110.42 | 180.00 | 110.20 | 1.5320 |
| IC | C3 | C4 | C5  | C6  | 1.5369 | 110.20 | 180.00 | 108.72 | 1.5316 |
| IC | C3 | C2 | C1  | O1  | 1.5000 | 116.00 | 180.00 | 108.89 | 1.4200 |
| IC | C2 | C1 | O1  | HO1 | 1.6170 | 108.07 | 180.00 | 109.97 | 0.9462 |
| IC | O1 | C2 | *C1 | H11 | 1.4350 | 108.07 | 120.00 | 105.35 | 1.0997 |

|    |    |    |     |     |        |        |         |        |          |
|----|----|----|-----|-----|--------|--------|---------|--------|----------|
| IC | O1 | C2 | *C1 | H12 | 1.4350 | 108.07 | -120.00 | 109.50 | 1.1112   |
| IC | O1 | C2 | *C1 | H1  | 1.4350 | 108.07 | 180.00  | 105.35 | 1.0997   |
| IC | C3 | C1 | *C2 | O2  | 1.5300 | 111.59 | 180.00  | 109.42 | 1.4226   |
| IC | C4 | C2 | *C3 | O3  | 1.5369 | 110.42 | 120.00  | 111.02 | 1.4276   |
| IC | C4 | C2 | *C3 | H3  | 1.4276 | 111.02 | -120.00 | 106.54 | 1.1878   |
| IC | C2 | C3 | O3  | HO3 | 1.5300 | 111.02 | -60.00  | 98.73  | 0.9915   |
| IC | C5 | C3 | *C4 | O4  | 1.5320 | 110.20 | 120.00  | 112.07 | 1.3955   |
| IC | C5 | C3 | *C4 | H4  | 1.3955 | 112.07 | -120.00 | 113.60 | 1.0969   |
| IC | C3 | C4 | O4  | HO4 | 1.5369 | 112.07 | -60.00  | 103.63 | 0.9940   |
| IC | C6 | C4 | *C5 | O5  | 1.5316 | 108.72 | 120.00  | 111.89 | 1.3976   |
| IC | C6 | C4 | *C5 | H5  | 1.5316 | 108.72 | -120.00 | 105.82 | 1.1468 ! |
| IC | C4 | C5 | O5  | HO5 | 1.5320 | 111.89 | -60.00  | 105.13 | 0.9258   |
| IC | C4 | C5 | C6  | O6  | 1.5320 | 108.72 | 180.00  | 105.74 | 1.4909   |
| IC | O6 | C5 | *C6 | H61 | 1.4909 | 105.74 | 120.00  | 106.59 | 1.0511   |
| IC | O6 | C5 | *C6 | H62 | 1.0511 | 106.59 | -120.00 | 106.23 | 1.0677   |
| IC | C5 | C6 | O6  | HO6 | 1.5316 | 105.74 | 180.00  | 115.02 | 0.9350   |

END

read para card append

\* Drude polarizable FF parameters, aldehydes and ketones

\*

BONDS

|        |        |        |         |
|--------|--------|--------|---------|
| CD201C | CD31C  | 245.00 | 1.491 ! |
| CD201D | LPD    | 0.00   | 0.000 ! |
| CD201C | LPD    | 0.00   | 0.000 ! |
| OD2C1D | LPD    | 0.00   | 0.000 ! |
| OD2C1C | LPD    | 0.00   | 0.000 ! |
| OD2C1D | CD201D | 750.00 | 1.218 ! |
| CD201D | CD33C  | 250.00 | 1.498 ! |
| CD201D | CD32C  | 245.00 | 1.491 ! |
| CD201C | HDP1C  | 310.00 | 1.104 ! |
| OD2C1C | CD201C | 750.00 | 1.218 ! |
| CD201C | CD33C  | 250.00 | 1.498 ! |
| CD201C | CD32C  | 245.00 | 1.491 ! |
| CD201C | CD31G  | 245.00 | 1.491 ! |
| CD201D | CD32F  | 250.00 | 1.498 ! |
| CD201D | CD31G  | 245.00 | 1.491 ! |
| OD31E  | HDP1A  | 536.50 | 0.960 ! |
| OD31E  | CD32F  | 320.00 | 1.425 ! |
| OD31E  | CD31G  | 350.00 | 1.430 ! |
| CD32F  | CD32F  | 222.50 | 1.500 ! |
| CD32F  | CD31G  | 222.50 | 1.510 ! |
| CD31G  | CD31G  | 222.50 | 1.510 ! |
| CD32F  | HDA2A  | 309.00 | 1.080 ! |
| CD31G  | HDA1A  | 309.00 | 1.080 ! |
| OD31E  | LPD    | 0.00   | 0.000 ! |
| CD32F  | LPD    | 0.00   | 0.000 ! |
| CD31G  | LPD    | 0.00   | 0.000 ! |

!!!!!!!!!!!!!!



ANGLES

|                              |        |        |       |        |       |       |   |
|------------------------------|--------|--------|-------|--------|-------|-------|---|
| CD201D                       | CD33C  | HDA3A  | 38.70 | 109.30 | !     |       |   |
| OD2C1D                       | CD201D | CD33C  | 63.60 | 121.81 | !     |       |   |
| CD33C                        | CD201D | CD33C  | 44.50 | 116.38 | !     |       |   |
| OD2C1D                       | CD201D | CD32C  | 60.60 | 121.19 | !     |       |   |
| CD33C                        | CD201D | CD32C  | 47.60 | 117.00 | !     |       |   |
| CD201D                       | CD32C  | CD33A  | 55.40 | 110.90 | !     |       |   |
| CD201D                       | CD32C  | HDA2A  | 39.00 | 107.77 | !     |       |   |
| CD201D                       | CD32C  | CD32A  | 57.50 | 110.20 | !     |       |   |
| CD32C                        | CD201D | CD32C  | 52.50 | 117.80 | !     |       |   |
| OD2C1D                       | CD201C | HDP1C  | 55.5  | 118.00 | !     |       |   |
| OD2C1C                       | CD201C | HDP1C  | 55.5  | 118.00 | !     |       |   |
| HDP1C                        | CD201C | CD33C  | 20.00 | 115.30 | !     |       |   |
| CD201C                       | CD33C  | HDA3A  | 38.70 | 109.30 | !     |       |   |
| OD2C1C                       | CD201C | CD33C  | 63.60 | 123.81 | !     |       |   |
| OD2C1C                       | CD201C | CD32C  | 60.60 | 121.19 | !     |       |   |
| OD2C1C                       | CD201C | CD31C  | 60.60 | 121.19 | !     |       |   |
| CD201C                       | CD32C  | CD33A  | 55.40 | 110.90 | !     |       |   |
| CD201C                       | CD32C  | HDA2A  | 39.00 | 107.77 | !     |       |   |
| CD201C                       | CD32C  | CD32A  | 57.50 | 110.20 | !     |       |   |
| CD201C                       | CD31C  | CD33A  | 55.40 | 110.90 | !     |       |   |
| CD201C                       | CD31C  | HDA1A  | 39.00 | 107.77 | !     |       |   |
| CD33A                        | CD31C  | CD33A  | 58.35 | 113.50 | 11.16 | 2.561 | ! |
| HDP1C                        | CD201C | CD32C  | 30.0  | 115.22 | !     |       |   |
| HDP1C                        | CD201C | CD31C  | 30.0  | 115.22 | !     |       |   |
| !!!!!!!!!!!!!!!!!!!!!!!!!!!! |        |        |       |        |       |       |   |
| HDA2A                        | CD32F  | CD201D | 26.50 | 110.10 | 22.53 | 2.179 | ! |
| OD31E                        | CD32F  | CD201D | 66.00 | 111.00 | !     |       |   |
| CD32F                        | CD201D | OD2C1D | 63.60 | 121.81 | !     |       |   |
| CD32F                        | CD201D | CD31G  | 44.50 | 116.38 | !     |       |   |
| OD2C1D                       | CD201D | CD31G  | 63.60 | 121.81 | !     |       |   |
| CD201D                       | CD31G  | CD31G  | 55.40 | 110.90 | !     |       |   |
| CD201D                       | CD31G  | HDA1A  | 39.00 | 107.77 | !     |       |   |
| CD201D                       | CD31G  | OD31E  | 39.00 | 107.77 | !     |       |   |
| HDP1C                        | CD201C | CD31G  | 30.0  | 115.22 | !     |       |   |
| OD2C1C                       | CD201C | CD31G  | 30.0  | 115.22 | !     |       |   |
| CD201C                       | CD31G  | OD31E  | 39.00 | 107.77 | !     |       |   |
| CD201C                       | CD31G  | HDA1A  | 39.00 | 107.77 | !     |       |   |
| CD201C                       | CD31G  | CD31G  | 58.35 | 113.50 | 11.16 | 2.561 | ! |
| !                            |        |        |       |        |       |       |   |
| CD31G                        | OD31E  | HDP1A  | 59.00 | 108.00 | !     |       |   |
| CD32F                        | OD31E  | HDP1A  | 49.00 | 107.30 | !     |       |   |
| OD31E                        | CD31G  | CD32F  | 59.30 | 111.00 | !     |       |   |
| OD31E                        | CD32F  | CD31G  | 66.00 | 111.00 | !     |       |   |
| OD31E                        | CD32F  | CD32F  | 66.00 | 111.00 | !     |       |   |
| OD31E                        | CD31G  | CD31G  | 66.00 | 111.00 | !     |       |   |
| OD31E                        | CD32F  | HDA2A  | 54.00 | 110.50 | !     |       |   |
| OD31E                        | CD31G  | HDA1A  | 47.00 | 110.50 | !     |       |   |
| CD32F                        | CD31G  | CD31G  | 58.35 | 113.50 | 11.16 | 2.561 | ! |
| CD32F                        | CD31G  | CD32F  | 58.35 | 113.50 | 11.16 | 2.561 | ! |
| CD31G                        | CD31G  | CD31G  | 58.35 | 113.50 | 11.16 | 2.561 | ! |
| CD31G                        | CD32F  | HDA2A  | 26.50 | 110.10 | 22.53 | 2.179 | ! |
| CD32F                        | CD31G  | HDA1A  | 34.50 | 110.10 | 22.53 | 2.179 | ! |
| CD31G                        | CD31G  | HDA1A  | 34.50 | 110.10 | 22.53 | 2.179 | ! |
| HDA2A                        | CD32F  | HDA2A  | 35.50 | 109.00 | 5.40  | 1.802 | ! |

## DIHEDRALS

|        |        |       |        |        |   |        |               |
|--------|--------|-------|--------|--------|---|--------|---------------|
| CD33A  | CD31C  | CD33A | HDA3A  | 0.150  | 3 | 0.00   | !             |
| CD201C | CD31C  | CD33A | HDA3A  | 0.200  | 3 | 0.00   | ! CNEU        |
| HDP1C  | CD201C | CD31C | HDA1A  | 0.200  | 3 | 0.00   | !             |
| OD2C1C | CD201C | CD31C | HDA1A  | 0.085  | 3 | 0.00   | !             |
| CD33C  | CD201D | CD33C | HDA3A  | 0.200  | 3 | 0.00   | ! acetone     |
| CD32C  | CD201D | CD33C | HDA3A  | 0.200  | 3 | 0.00   | !             |
| CD32C  | CD201D | CD32C | HDA2A  | 0.200  | 3 | 0.00   | ! 3-pentanone |
| CD33C  | CD201D | CD32C | HDA2A  | 0.200  | 3 | 0.00   | !             |
| OD2C1D | CD201D | CD33C | HDA3A  | 0.085  | 3 | 0.00   | !             |
| OD2C1D | CD201D | CD32C | HDA2A  | 0.085  | 3 | 0.00   | !             |
| CD201D | CD32C  | CD33A | HDA3A  | 0.120  | 3 | 180.00 | !             |
| CD201D | CD32C  | CD32A | HDA2A  | 0.200  | 3 | 180.00 | ! 2-pentanone |
| HDP1C  | CD201C | CD32C | HDA2A  | 0.200  | 3 | 0.00   | ! ethanal     |
| HDP1C  | CD201C | CD33C | HDA3A  | 0.200  | 3 | 0.00   | !             |
| CD201C | CD32C  | CD33A | HDA3A  | 0.120  | 3 | 180.00 | !             |
| CD33A  | CD32A  | CD32C | CD201C | 0.5501 | 1 | 0.00   | !             |
| CD33A  | CD32A  | CD32C | CD201C | 0.9806 | 2 | 0.00   | !             |
| CD33A  | CD32A  | CD32C | CD201C | 0.3445 | 3 | 0.00   | !             |
| CD201C | CD32C  | CD32A | HDA2A  | 0.200  | 3 | 180.00 | !             |
| OD2C1C | CD201C | CD33C | HDA3A  | 0.015  | 3 | 0.00   | !             |
| OD2C1C | CD201C | CD32C | HDA2A  | 0.015  | 3 | 0.00   | !             |
| CD201C | CD31G  | CD31G | HDA1A  | 0.5750 | 1 | 0.00   | !             |
| CD201C | CD31G  | CD31G | HDA1A  | 0.4780 | 2 | 0.00   | !             |
| CD201C | CD31G  | CD31G | HDA1A  | 0.2480 | 3 | 0.00   | !             |
| CD201C | CD31G  | CD31G | OD31E  | 0.3100 | 1 | 0.00   | !             |
| CD201C | CD31G  | CD31G | OD31E  | 0.1370 | 2 | 0.00   | !             |
| CD201C | CD31G  | CD31G | OD31E  | 0.1130 | 3 | 0.00   | !             |
| CD201C | CD31G  | CD31G | CD31G  | 1.5480 | 1 | 180.00 | !             |
| CD201C | CD31G  | CD31G | CD31G  | 0.3290 | 2 | 180.00 | !             |
| CD201C | CD31G  | CD31G | CD31G  | 0.0960 | 3 | 180.00 | !             |
| HDP1A  | OD31E  | CD31G | HDA1A  | 0.200  | 3 | 0.00   | !             |
| CD31G  | CD31G  | OD31E | HDP1A  | 0.5750 | 1 | 0.00   | !             |
| CD31G  | CD31G  | OD31E | HDP1A  | 0.4780 | 2 | 0.00   | !             |
| CD31G  | CD31G  | OD31E | HDP1A  | 0.2480 | 3 | 0.00   | !             |
| CD201D | CD31G  | CD31G | CD31G  | 1.5480 | 1 | 180.00 | !             |
| CD201D | CD31G  | CD31G | CD31G  | 0.3290 | 2 | 180.00 | !             |
| CD201D | CD31G  | CD31G | CD31G  | 0.0960 | 3 | 180.00 | !             |
| CD201D | CD31G  | CD31G | HDA1A  | 0.200  | 3 | 0.00   | !             |
| CD201D | CD31G  | CD31G | OD31E  | 0.3100 | 1 | 0.00   | !             |
| CD201D | CD31G  | CD31G | OD31E  | 0.1370 | 2 | 0.00   | !             |
| CD201D | CD31G  | CD31G | OD31E  | 0.1130 | 3 | 0.00   | !             |
| HDP1A  | OD31E  | CD32F | HDA2A  | 0.200  | 3 | 0.00   | !             |
| CD201D | CD32F  | OD31E | HDP1A  | 0.5750 | 1 | 0.00   | !             |
| CD201D | CD32F  | OD31E | HDP1A  | 0.4780 | 2 | 0.00   | !             |
| CD201D | CD32F  | OD31E | HDP1A  | 0.2480 | 3 | 0.00   | !             |
| CD201D | CD31G  | OD31E | HDP1A  | 0.5750 | 1 | 0.00   | !             |
| CD201D | CD31G  | OD31E | HDP1A  | 0.4780 | 2 | 0.00   | !             |
| CD201D | CD31G  | OD31E | HDP1A  | 0.2480 | 3 | 0.00   | !             |
| CD31G  | CD31G  | CD31G | OD31E  | 0.3100 | 1 | 0.00   | !             |
| CD31G  | CD31G  | CD31G | OD31E  | 0.1370 | 2 | 0.00   | !             |
| CD31G  | CD31G  | CD31G | OD31E  | 0.1130 | 3 | 0.00   | !             |
| CD31G  | CD31G  | CD31G | CD31G  | 1.5480 | 1 | 180.00 | !             |
| CD31G  | CD31G  | CD31G | CD31G  | 0.3290 | 2 | 180.00 | !             |

|        |        |       |       |        |   |        |                 |
|--------|--------|-------|-------|--------|---|--------|-----------------|
| CD31G  | CD31G  | CD31G | CD31G | 0.0960 | 3 | 180.00 | !               |
| HDA1A  | CD31G  | CD31G | HDA1A | 0.200  | 3 | 0.00   | !               |
| HDA1A  | CD31G  | CD31G | CD31G | 0.200  | 3 | 0.00   | !               |
| OD31E  | CD31G  | CD31G | HDA1A | 0.200  | 3 | 0.00   | !               |
| OD31E  | CD31G  | CD31G | OD31E | 1.3050 | 1 | 180.00 | !               |
| OD31E  | CD31G  | CD31G | OD31E | 0.3760 | 2 | 180.00 | !               |
| OD31E  | CD31G  | CD31G | OD31E | 0.4130 | 3 | 180.00 | !               |
| CD31G  | CD31G  | CD31G | CD32F | 1.5480 | 1 | 180.00 | !               |
| CD31G  | CD31G  | CD31G | CD32F | 0.3290 | 2 | 180.00 | !               |
| CD31G  | CD31G  | CD31G | CD32F | 0.0960 | 3 | 180.00 | !               |
| CD31G  | CD31G  | CD32F | OD31E | 0.3100 | 1 | 0.00   | !               |
| CD31G  | CD31G  | CD32F | OD31E | 0.1370 | 2 | 0.00   | !               |
| CD31G  | CD31G  | CD32F | OD31E | 0.1130 | 3 | 0.00   | !               |
| HDA1A  | CD31G  | CD31G | CD32F | 0.200  | 3 | 0.00   | !               |
| CD31G  | CD32F  | OD31E | HDP1A | 0.5750 | 1 | 0.00   | !               |
| CD31G  | CD32F  | OD31E | HDP1A | 0.4780 | 2 | 0.00   | !               |
| CD31G  | CD32F  | OD31E | HDP1A | 0.2480 | 3 | 0.00   | !               |
| OD31E  | CD31G  | CD32F | HDA2A | 0.200  | 3 | 0.00   | ! glycerol, xhe |
| OD31E  | CD31G  | CD32F | OD31E | 1.3050 | 1 | 180.00 | !               |
| OD31E  | CD31G  | CD32F | OD31E | 0.3760 | 2 | 180.00 | !               |
| OD31E  | CD31G  | CD32F | OD31E | 0.4130 | 3 | 180.00 | !               |
| HDA2A  | CD32F  | CD31G | CD31G | 0.200  | 3 | 0.00   | !               |
| CD32F  | CD31G  | CD31G | OD31E | 0.3100 | 1 | 0.00   | !               |
| CD32F  | CD31G  | CD31G | OD31E | 0.1370 | 2 | 0.00   | !               |
| CD32F  | CD31G  | CD31G | OD31E | 0.1130 | 3 | 0.00   | !               |
| HDA2A  | CD32F  | CD31G | HDA1A | 0.200  | 3 | 0.00   | ! glycerol, xhe |
| OD31E  | CD32F  | CD31G | HDA1A | 0.200  | 3 | 0.00   | ! glycerol, xhe |
| CD32F  | CD31G  | OD31E | HDP1A | 0.5750 | 1 | 0.00   | !               |
| CD32F  | CD31G  | OD31E | HDP1A | 0.4780 | 2 | 0.00   | !               |
| CD32F  | CD31G  | OD31E | HDP1A | 0.2480 | 3 | 0.00   | !               |
| !bton  |        |       |       |        |   |        |                 |
| CD33C  | CD201D | CD32C | CD33A | 0.3865 | 1 | 0.00   | !               |
| CD33C  | CD201D | CD32C | CD33A | 0.1195 | 2 | 180.00 | !               |
| CD33C  | CD201D | CD32C | CD33A | 0.0911 | 3 | 0.00   | !               |
| CD33C  | CD201D | CD32C | CD33A | 0.0307 | 6 | 0.00   | !               |
| OD2C1D | CD201D | CD32C | CD33A | 0.3890 | 1 | 180.00 | !               |
| OD2C1D | CD201D | CD32C | CD33A | 0.2715 | 2 | 180.00 | !               |
| OD2C1D | CD201D | CD32C | CD33A | 0.0825 | 3 | 180.00 | !               |
| OD2C1D | CD201D | CD32C | CD33A | 0.0164 | 6 | 0.00   | !               |
| !pald  |        |       |       |        |   |        |                 |
| OD2C1C | CD201C | CD32C | CD33A | 0.2416 | 1 | 180.00 | !               |
| OD2C1C | CD201C | CD32C | CD33A | 0.2059 | 2 | 180.00 | !               |
| OD2C1C | CD201C | CD32C | CD33A | 0.1496 | 3 | 180.00 | !               |
| OD2C1C | CD201C | CD32C | CD33A | 0.0765 | 6 | 180.00 | !               |
| HDP1C  | CD201C | CD32C | CD33A | 0.2240 | 1 | 0.00   | !               |
| HDP1C  | CD201C | CD32C | CD33A | 0.2179 | 2 | 180.00 | !               |
| HDP1C  | CD201C | CD32C | CD33A | 0.3116 | 3 | 0.00   | !               |
| HDP1C  | CD201C | CD32C | CD33A | 0.0606 | 6 | 0.00   | !               |
| !bald  |        |       |       |        |   |        |                 |
| OD2C1C | CD201C | CD32C | CD32A | 0.3296 | 1 | 180.00 | !               |
| OD2C1C | CD201C | CD32C | CD32A | 0.1850 | 2 | 180.00 | !               |
| OD2C1C | CD201C | CD32C | CD32A | 0.1420 | 3 | 180.00 | !               |
| OD2C1C | CD201C | CD32C | CD32A | 0.0086 | 6 | 0.00   | !               |
| HDP1C  | CD201C | CD32C | CD32A | 0.2032 | 1 | 0.00   | !               |
| HDP1C  | CD201C | CD32C | CD32A | 0.0704 | 2 | 180.00 | !               |

|          |        |       |       |        |   |          |
|----------|--------|-------|-------|--------|---|----------|
| HDP1C    | CD201C | CD32C | CD32A | 0.2642 | 3 | 0.00 !   |
| HDP1C    | CD201C | CD32C | CD32A | 0.0220 | 6 | 180.00 ! |
| !ibld    |        |       |       |        |   |          |
| OD2C1C   | CD201C | CD31C | CD33A | 0.3499 | 1 | 180.00 ! |
| OD2C1C   | CD201C | CD31C | CD33A | 0.4616 | 2 | 180.00 ! |
| OD2C1C   | CD201C | CD31C | CD33A | 0.3495 | 3 | 180.00 ! |
| OD2C1C   | CD201C | CD31C | CD33A | 0.0181 | 6 | 0.00 !   |
| HDP1C    | CD201C | CD31C | CD33A | 0.0438 | 1 | 180.00 ! |
| HDP1C    | CD201C | CD31C | CD33A | 0.0154 | 2 | 180.00 ! |
| HDP1C    | CD201C | CD31C | CD33A | 0.1205 | 3 | 0.00 !   |
| HDP1C    | CD201C | CD31C | CD33A | 0.0017 | 6 | 0.00 !   |
| !allose  |        |       |       |        |   |          |
| OD2C1C   | CD201C | CD31G | CD31G | 0.0012 | 1 | 180.00 ! |
| OD2C1C   | CD201C | CD31G | CD31G | 0.1111 | 2 | 180.00 ! |
| OD2C1C   | CD201C | CD31G | CD31G | 0.2372 | 3 | 0.00 !   |
| OD2C1C   | CD201C | CD31G | CD31G | 0.2931 | 6 | 180.00 ! |
| OD2C1C   | CD201C | CD31G | OD31E | 0.3563 | 1 | 180.00 ! |
| OD2C1C   | CD201C | CD31G | OD31E | 0.3963 | 2 | 180.00 ! |
| OD2C1C   | CD201C | CD31G | OD31E | 0.3065 | 3 | 180.00 ! |
| OD2C1C   | CD201C | CD31G | OD31E | 0.0015 | 6 | 0.00 !   |
| HDP1C    | CD201C | CD31G | CD31G | 0.0083 | 1 | 180.00 ! |
| HDP1C    | CD201C | CD31G | CD31G | 0.0849 | 2 | 180.00 ! |
| HDP1C    | CD201C | CD31G | CD31G | 0.2089 | 3 | 180.00 ! |
| HDP1C    | CD201C | CD31G | CD31G | 0.2669 | 6 | 180.00 ! |
| HDP1C    | CD201C | CD31G | OD31E | 0.3506 | 1 | 0.00 !   |
| HDP1C    | CD201C | CD31G | OD31E | 0.4009 | 2 | 180.00 ! |
| HDP1C    | CD201C | CD31G | OD31E | 0.3351 | 3 | 0.00 !   |
| HDP1C    | CD201C | CD31G | OD31E | 0.0209 | 6 | 0.00 !   |
| OD2C1C   | CD201C | CD31G | HDA1A | 0.8416 | 1 | 0.00 !   |
| OD2C1C   | CD201C | CD31G | HDA1A | 0.4707 | 2 | 0.00 !   |
| OD2C1C   | CD201C | CD31G | HDA1A | 0.1441 | 3 | 0.00 !   |
| OD2C1C   | CD201C | CD31G | HDA1A | 0.2459 | 6 | 0.00 !   |
| HDP1C    | CD201C | CD31G | HDA1A | 0.8210 | 1 | 180.00 ! |
| HDP1C    | CD201C | CD31G | HDA1A | 0.4598 | 2 | 0.00 !   |
| HDP1C    | CD201C | CD31G | HDA1A | 0.1146 | 3 | 180.00 ! |
| HDP1C    | CD201C | CD31G | HDA1A | 0.2732 | 6 | 0.00 !   |
| CD201C   | CD31G  | OD31E | HDP1A | 0.2498 | 1 | 180.00 ! |
| CD201C   | CD31G  | OD31E | HDP1A | 1.3598 | 2 | 180.00 ! |
| CD201C   | CD31G  | OD31E | HDP1A | 0.0193 | 3 | 180.00 ! |
| CD201C   | CD31G  | OD31E | HDP1A | 0.1968 | 6 | 0.00 !   |
| !psicose |        |       |       |        |   |          |
| CD31G    | CD201D | CD32F | OD31E | 0.4641 | 1 | 0.00 !   |
| CD31G    | CD201D | CD32F | OD31E | 0.4326 | 2 | 180.00 ! |
| CD31G    | CD201D | CD32F | OD31E | 0.1294 | 3 | 0.00 !   |
| CD31G    | CD201D | CD32F | OD31E | 0.0860 | 6 | 180.00 ! |
| OD2C1D   | CD201D | CD32F | OD31E | 0.3933 | 1 | 180.00 ! |
| OD2C1D   | CD201D | CD32F | OD31E | 0.6869 | 2 | 180.00 ! |
| OD2C1D   | CD201D | CD32F | OD31E | 0.1268 | 3 | 180.00 ! |
| OD2C1D   | CD201D | CD32F | OD31E | 0.0412 | 6 | 0.00 !   |
| CD31G    | CD201D | CD32F | HDA2A | 0.4743 | 1 | 180.00 ! |
| CD31G    | CD201D | CD32F | HDA2A | 0.4251 | 2 | 0.00 !   |
| CD31G    | CD201D | CD32F | HDA2A | 0.1273 | 3 | 0.00 !   |
| CD31G    | CD201D | CD32F | HDA2A | 0.0222 | 6 | 180.00 ! |
| OD2C1D   | CD201D | CD32F | HDA2A | 0.4009 | 1 | 0.00 !   |
| OD2C1D   | CD201D | CD32F | HDA2A | 0.6630 | 2 | 0.00 !   |

|        |        |       |       |        |   |        |   |
|--------|--------|-------|-------|--------|---|--------|---|
| OD2C1D | CD201D | CD32F | HDA2A | 0.1203 | 3 | 180.00 | ! |
| OD2C1D | CD201D | CD32F | HDA2A | 0.0433 | 6 | 0.00   | ! |
| CD32F  | CD201D | CD31G | CD31G | 0.7131 | 1 | 180.00 | ! |
| CD32F  | CD201D | CD31G | CD31G | 0.0285 | 2 | 0.00   | ! |
| CD32F  | CD201D | CD31G | CD31G | 0.0334 | 3 | 180.00 | ! |
| CD32F  | CD201D | CD31G | CD31G | 0.0975 | 6 | 0.00   | ! |
| OD2C1D | CD201D | CD31G | CD31G | 0.8248 | 1 | 0.00   | ! |
| OD2C1D | CD201D | CD31G | CD31G | 0.1086 | 2 | 180.00 | ! |
| OD2C1D | CD201D | CD31G | CD31G | 0.0384 | 3 | 180.00 | ! |
| OD2C1D | CD201D | CD31G | CD31G | 0.0570 | 6 | 180.00 | ! |
| CD32F  | CD201D | CD31G | HDA1A | 0.2186 | 1 | 180.00 | ! |
| CD32F  | CD201D | CD31G | HDA1A | 0.6386 | 2 | 0.00   | ! |
| CD32F  | CD201D | CD31G | HDA1A | 0.0179 | 3 | 0.00   | ! |
| CD32F  | CD201D | CD31G | HDA1A | 0.0144 | 6 | 0.00   | ! |
| OD2C1D | CD201D | CD31G | HDA1A | 0.1422 | 1 | 0.00   | ! |
| OD2C1D | CD201D | CD31G | HDA1A | 0.8277 | 2 | 0.00   | ! |
| OD2C1D | CD201D | CD31G | HDA1A | 0.0736 | 3 | 180.00 | ! |
| OD2C1D | CD201D | CD31G | HDA1A | 0.1325 | 6 | 180.00 | ! |
| CD32F  | CD201D | CD31G | OD31E | 0.9903 | 1 | 0.00   | ! |
| CD32F  | CD201D | CD31G | OD31E | 0.9450 | 2 | 180.00 | ! |
| CD32F  | CD201D | CD31G | OD31E | 0.2364 | 3 | 0.00   | ! |
| CD32F  | CD201D | CD31G | OD31E | 0.0482 | 6 | 0.00   | ! |
| OD2C1D | CD201D | CD31G | OD31E | 1.0531 | 1 | 180.00 | ! |
| OD2C1D | CD201D | CD31G | OD31E | 1.0554 | 2 | 180.00 | ! |
| OD2C1D | CD201D | CD31G | OD31E | 0.2935 | 3 | 180.00 | ! |
| OD2C1D | CD201D | CD31G | OD31E | 0.0441 | 6 | 0.00   | ! |

IMPROPERS

|        |       |       |        |        |   |      |   |
|--------|-------|-------|--------|--------|---|------|---|
| CD201D | CD33C | CD33C | OD2C1D | 98.000 | 0 | 0.00 | ! |
| CD201D | CD33C | CD32C | OD2C1D | 93.000 | 0 | 0.00 | ! |
| CD201D | CD32C | CD32C | OD2C1D | 95.000 | 0 | 0.00 | ! |
| CD201C | HDP1C | CD33C | OD2C1D | 75.000 | 0 | 0.00 | ! |
| CD201C | HDP1C | CD32C | OD2C1D | 71.300 | 0 | 0.00 | ! |
| CD201C | HDP1C | CD33C | OD2C1C | 75.000 | 0 | 0.00 | ! |
| CD201C | HDP1C | CD32C | OD2C1C | 71.300 | 0 | 0.00 | ! |
| CD201C | HDP1C | CD31C | OD2C1C | 71.300 | 0 | 0.00 | ! |
| CD201C | HDP1C | CD31G | OD2C1C | 71.300 | 0 | 0.00 | ! |
| CD201D | CD32F | CD31G | OD2C1D | 93.000 | 0 | 0.00 | ! |

NONBONDED nbxmod 5 atom vatom cdie1 vdistance switch vswitch -  
cutnb 16.0 ctofnb 12.0 ctonnb 10.0 eps 1.0 e14fac 1.0 wmin 1.5

| ! atom (ignore) | eps | rmin/2 |                          |
|-----------------|-----|--------|--------------------------|
| OD2C1C          | 0.0 | -0.175 | 1.875 ! aldehydes        |
| CD201C          | 0.0 | -0.115 | 1.680 ! aldehydes        |
| OD2C1D          | 0.0 | -0.200 | 1.85 ! ketones/aldehydes |
| CD201D          | 0.0 | -0.135 | 1.75 ! ketones           |
| HDP1C           | 0.0 | -0.065 | 0.95 ! aldehydes         |

NBFIX

|     |        |           |         |           |               |            |
|-----|--------|-----------|---------|-----------|---------------|------------|
| ODW | OD2C1C | -0.192    | 3.61    | !Original | -0.1921329455 | 3.66193    |
| ODW | CD201C | -0.235    | 3.58    | !Original | -0.1557513202 | 3.46692899 |
| ODW | OD2C1D | -0.285399 | 3.63693 | !Original | -0.2053987585 | 3.63693    |
| ODW | CD201D | -0.228752 | 3.53693 | !Original | -0.1687523    | 3.53693    |

END
